# Supplementary material
Source: publisher figshare collection journal article supplement (https://acs.figshare.com/ndownloader/files/4749436)
Supplement: Supplementary file 1 [file 4749436]

## Keto Forms of Salicylaldehyde Schiff Bases: Structural and Theoretical Aspects

Spyros D. Chatziefthimiou, Yannis G. Lazarou, Eugene Hadjoudis, Tereza

Dziembowska<sup>1</sup> and Irene M. Mavridis<sup>\*</sup>

*Institute of Physical Chemistry, National Center for Scientific Research*

*“Demokritos”, P.O. Box 60228, Aghia Paraskevi 15310, Greece*

## SUPPORTING INFORMATION

---

<sup>1</sup> Institute of Chemistry and Environmental Protection, Technical University of Szczecin Al. Piastów 42, 71-065 Szczecin, Poland

<sup>\*</sup> E-mail: mavridi@chem.demokritos.gr, fax: +30 210 6511766

**Table S1.** Least square planes of monomers and deviations from them of atoms involved in hydrogen bonds (O1, N and H<sub>N</sub> or H<sub>O</sub>). Last column shows least square planes of keto-dimers (based on the two phenyl rings).

| Compound  | Plane through atoms C <sub>1</sub> -C <sub>6</sub> |                |          |                                 | Planes through atoms C <sub>1</sub> -C <sub>6</sub> in dimers |
|-----------|----------------------------------------------------|----------------|----------|---------------------------------|---------------------------------------------------------------|
|           | rms deviation                                      | O <sub>1</sub> | N        | H <sub>N</sub> / H <sub>O</sub> | rms deviation                                                 |
| <b>1</b>  | 0.009                                              | 0.028(2)       | 0.074(3) | 0.04(2)                         | 0.1094                                                        |
| <b>2</b>  | 0.012                                              | 0.059(3)       | 0.159(3) | 0.12(2)                         | 0.0543                                                        |
| <b>3</b>  | 0.011                                              | 0.029(2)       | 0.140(3) | 0.11 (2)                        | 0.0748                                                        |
| <b>4</b>  | 0.006                                              | 0.014(3)       | 0.127(4) | 0.09(3)                         | 0.5955                                                        |
| <b>5</b>  | 0.006                                              | 0.039(4)       | 0.132(6) | 0.11(5)/0.07(6)                 |                                                               |
| <b>6</b>  | 0.003                                              | 0.006(2)       | 0.063(3) | - /0.01(2)                      |                                                               |
| <b>7</b>  | 0.005                                              | 0.001(3)       | 0.016(3) | - / 0.04(3)                     |                                                               |
| <b>8</b>  | 0.010                                              | 0.058(4)       | 0.030(6) | - / 0.07(4)                     |                                                               |
| <b>9</b>  | 0.005                                              | 0.032(6)       | 0.133(6) | - / 0.02(5)                     |                                                               |
| <b>10</b> | 0.003                                              | 0.016(4)       | 0.071(5) | - / 0.08(4)                     |                                                               |

**Table S2.** Electronic energy differences  $\Delta E$  between the syn-enol and cis-keto forms of dimers (without zero-point energies, in kJ/mol) at the B3P86/aug-cc-pVDZ and B3LYP/aug-cc-pVDZ levels of theory, for the compounds **1**, **4**, and **10**.

| Compound  | dimer-1 | dimer-4 | dimer-10a | dimer-10b | Level of theory       |
|-----------|---------|---------|-----------|-----------|-----------------------|
| <b>1</b>  | 18.0    | -       | -8.2      | -18.4     | B3P86/<br>aug-cc-pVDZ |
|           | 18.3    | -       | -6.5      | -18.0     | B3LYP/<br>aug-cc-pVDZ |
| <b>4</b>  | 4.5     | 0.6     | 0.6       | -16.9     | B3P86/<br>aug-cc-pVDZ |
|           | 2.8     | -0.6    | 2.8       | -16.8     | B3LYP/<br>aug-cc-pVDZ |
| <b>10</b> | -4.5    | 0.6     | -25.2     | -25.8     | B3P86/<br>aug-cc-pVDZ |
|           | -6.7    | -2.5    | -25.5     | -26.4     | B3LYP/<br>aug-cc-pVDZ |

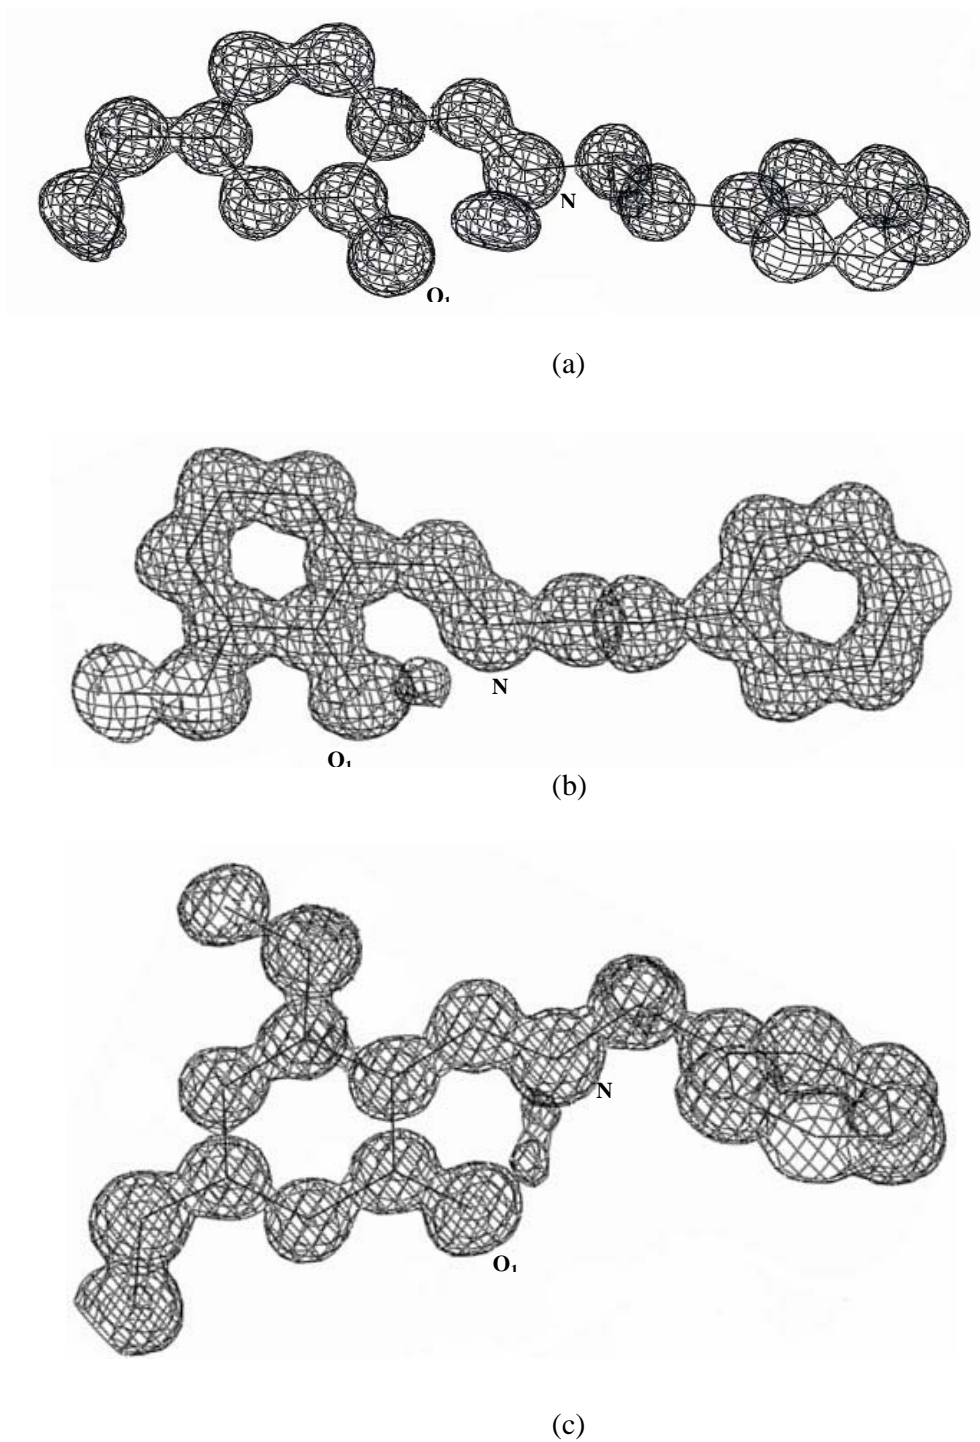

**Figure S1.** Electron density maps and models of: (a) **3**, belonging to the keto group (b) **9**, belonging to the enol group and (c) **5**, belonging to the group with a mixture of the two forms, calculated with coefficients  $2F_o - F_c$  for the non-hydrogen atoms (contoured at  $1.5\sigma$ ) and  $F_o - F_c$  for the OH and/or NH hydrogen atoms (contoured at  $3\sigma$ ).

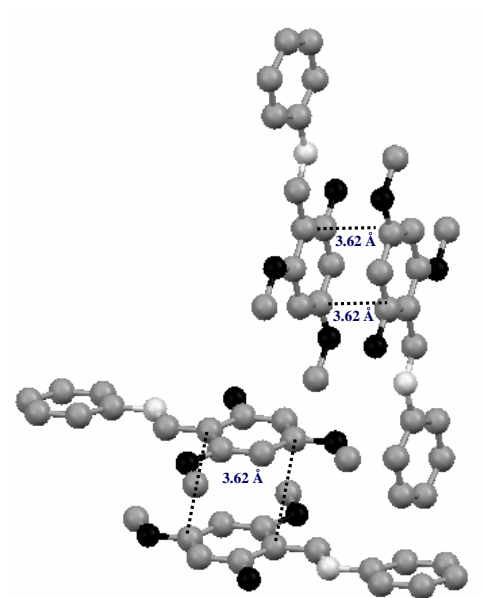

**Figure S2.**  $\pi \cdots \pi$  interactions in **7** (colour code as in Figure 1).

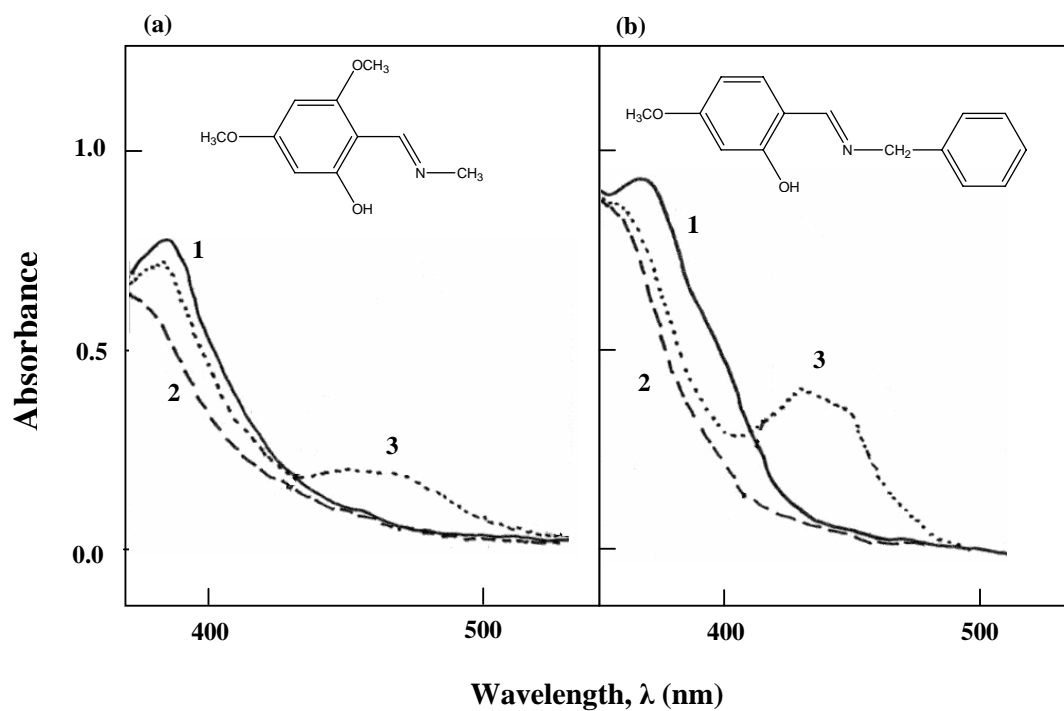

**Figure S3.** Absorption spectra of thin polycrystalline films of compounds **1** and **8**. Curve 1 at room temperature, 2 at liquid nitrogen temperature (it turns back to 1 at room temperature), and 3 after irradiation with 365 nm light at liquid nitrogen temperature (it turns back to 1 at room temperature in the dark).
